# Supplementary material for: JME-001 phase II trial of first-line combination chemotherapy with cisplatin, pemetrexed, and nivolumab for unresectable malignant pleural mesothelioma
Source: PubMed Central journal article supplement (PMC8557301; doi:10.1136/jitc-2021-003288), 2021-10-28

Supplementary Figure 1 (A)

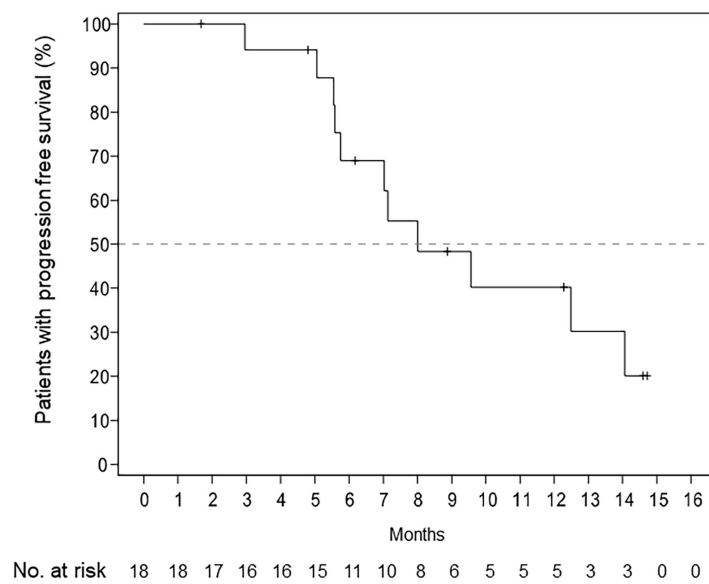

Supplement: jitc-2021-003288supp001.pdf [file jitc-2021-003288supp001.pdf]
