# Supplementary material for: JME-001 phase II trial of first-line combination chemotherapy with cisplatin, pemetrexed, and nivolumab for unresectable malignant pleural mesothelioma
Source: HighWire-hosted journal article supplement (doi:10.1136/jitc-2021-003288), 2021-10-01

## Supplementary Figure 1 (B)

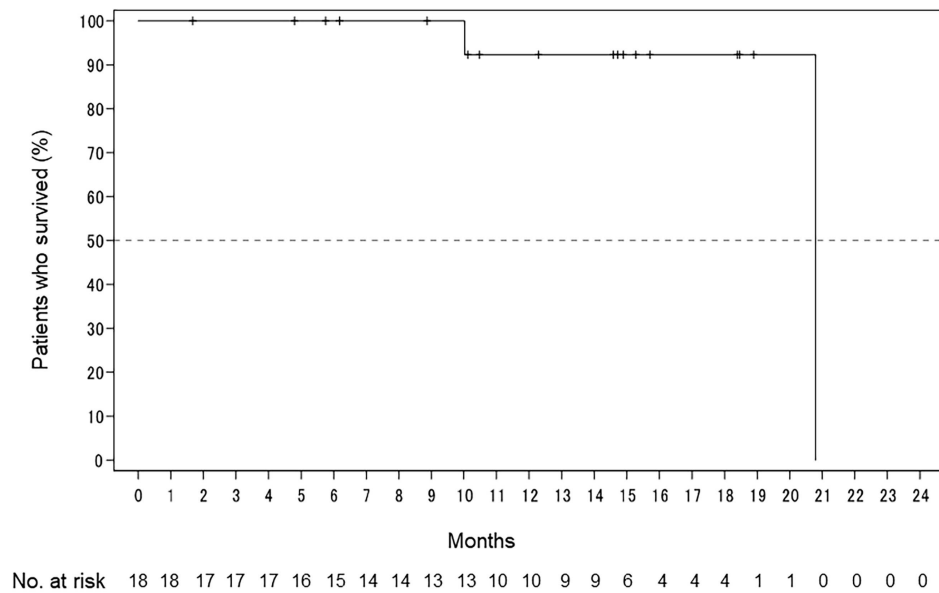

Supplement: jitc-2021-003288supp002_data_supplement.pdf [file jitc-2021-003288supp002_data_supplement.pdf]
